# Supplementary material for: Nephroprotective mechanisms of Rhizoma Chuanxiong and Radix et Rhizoma Rhei against acute renal injury and renal fibrosis based on network pharmacology and experimental validation
Source: Front Pharmacol. 2023 May 9;14:1154743. doi: 10.3389/fphar.2023.1154743 (PMC10203597; doi:10.3389/fphar.2023.1154743)
Supplement: Supplementary file 10 [file Table4.XLSX]

## Sheet: C2609414
Disease	Disease_id	Gene	Gene_id	UniProt	Gene_Full_Name	Protein_Class	N_diseases_g	DSI_g	DPI_g	pLI	Score_gda	EL_gda	EI_gda	N_PMIDs	N_SNPs_gda	First_Ref	Last_Ref
Acute kidney injury	C2609414	SIRT1	23411	Q96EB6	sirtuin 1	Epigenetic regulator	675	0.378	0.885	0.087326	0.5		1	1	0	2011	2011
Acute kidney injury	C2609414	PPARG	5468	P37231	peroxisome proliferator activated receptor gamma	Nuclear receptor	877	0.358	0.885	0.029194	0.5		1	4	0	2007	2014
Acute kidney injury	C2609414	CLU	1191	P10909	clusterin		412	0.426	0.885	7.8072e-05	0.5		1	7	0	2010	2017
Acute kidney injury	C2609414	HMOX1	3162	P09601	heme oxygenase 1		666	0.381	0.923	0.0096817	0.5		1	2	0	2011	2013
Acute kidney injury	C2609414	HP	3240	P00738	haptoglobin	Enzyme	464	0.412	0.885	1.736e-05	0.5		1	2	0	2009	2017
Acute kidney injury	C2609414	B2M	567	P61769	beta-2-microglobulin	Immune response	352	0.447	0.846	0.56167	0.5		1	4	0	1989	2017
Acute kidney injury	C2609414	HBEGF	1839	Q99075	heparin binding EGF like growth factor	Signaling	155	0.52	0.769	0.07563	0.5		1	2	0	1995	2001
Acute kidney injury	C2609414	GFER	2671	P55789	growth factor, augmenter of liver regeneration	Enzyme	120	0.56	0.846	0.00017308	0.5		1	1	0	2009	2009
Acute kidney injury	C2609414	NQO1	1728	P15559	NAD(P)H quinone dehydrogenase 1		368	0.434	0.885	1.1867e-09	0.5		1	2	0	2016	2017
Acute kidney injury	C2609414	TLR4	7099	O00206	toll like receptor 4		1174	0.321	0.962	4.6131e-09	0.5		1	2	0	2012	2018
Acute kidney injury	C2609414	HAVCR1	26762	Q96D42	hepatitis A virus cellular receptor 1		217	0.489	0.885	8.5105e-07	0.5		1	11	0	2010	2017
Acute kidney injury	C2609414	BAX	581	Q07812	BCL2 associated X, apoptosis regulator	Signaling	420	0.417	0.885	0.31746	0.5		1	2	0	2010	2011
Acute kidney injury	C2609414	ATP5F1B	506	P06576	ATP synthase F1 subunit beta	Transporter	62	0.626	0.654	0.97679	0.5		1	1	0	2015	2015
Acute kidney injury	C2609414	NOS3	4846	P29474	nitric oxide synthase 3		706	0.378	0.885	6.7246e-07	0.5		1	2	0	1998	2017
Acute kidney injury	C2609414	NPPA	4878	P01160	natriuretic peptide A		217	0.505	0.769	0.00054522	0.5		1	4	0	1986	2012
Acute kidney injury	C2609414	NFE2L2	4780	Q16236	nuclear factor, erythroid 2 like 2	Enzyme	823	0.357	0.885	0.0035719	0.5		1	2	0	2014	2014
Acute kidney injury	C2609414	LCN2	3934	P80188	lipocalin 2	Enzyme	497	0.405	0.885	1.1404e-09	0.5		1	6	0	2011	2017
Acute kidney injury	C2609414	MPO	4353	P05164	myeloperoxidase	Enzyme	653	0.377	0.923	7.105e-15	0.5		1	2	0	2009	2011
Acute kidney injury	C2609414	EGFR	1956	P00533	epidermal growth factor receptor	Kinase	1394	0.295	0.885	0.36837	0.5		1	2	0	2001	2003
Acute kidney injury	C2609414	C3	718	P01024	complement C3	Enzyme modulator	343	0.445	0.885	0.90421	0.4		1	1	0	2017	2017
Acute kidney injury	C2609414	SLC22A12	116085	Q96S37	solute carrier family 22 member 12	Transporter	43	0.647	0.538	1.6891e-13	0.4		1	1	0	2003	2003
Acute kidney injury	C2609414	UGT1A9	54600	O60656	UDP glucuronosyltransferase family 1 member A9		94	0.59	0.577	5.3634e-08	0.3		1	1	0	2011	2011
Acute kidney injury	C2609414	IGFBP1	3484	P08833	insulin like growth factor binding protein 1	Enzyme modulator	191	0.502	0.808	0.00094677	0.3		1	1	0	1995	1995
Acute kidney injury	C2609414	UGT1A1	54658	P22309	UDP glucuronosyltransferase family 1 member A1		302	0.464	0.769	3.2577e-06	0.3		1	1	0	1985	1985
Acute kidney injury	C2609414	INS	3630	P01308	insulin		405	0.445	0.923	0.30091	0.3		1	1	0	2002	2002
Acute kidney injury	C2609414	IL6	3569	P05231	interleukin 6		2367	0.248	0.962	0.31536	0.3		1	1	0	2011	2011
Acute kidney injury	C2609414	IL10	3586	P22301	interleukin 10		1679	0.281	0.923	0.0058874	0.3		1	1	0	2008	2008
Acute kidney injury	C2609414	IGF1	3479	P05019	insulin like growth factor 1		1206	0.318	0.885	0.2716	0.3		1	1	0	1995	1995
Acute kidney injury	C2609414	GSTP1	2950	P09211	glutathione S-transferase pi 1		610	0.383	0.923	0.014155	0.3		1	1	0	2011	2011
Acute kidney injury	C2609414	MIR146B	574447		microRNA 146b		187	0.496	0.769		0.3		1	1	0	2019	2019
Acute kidney injury	C2609414	HBG2	3048	P69892	hemoglobin subunit gamma 2		112	0.565	0.692	0.66982	0.3		1	2	0	1977	1977
Acute kidney injury	C2609414	HEXB	3074	P07686	hexosaminidase subunit beta	Enzyme	62	0.644	0.654	3.4915e-10	0.3		1	1	0	2011	2011
Acute kidney injury	C2609414	MTHFR	4524	P42898	methylenetetrahydrofolate reductase		985	0.337	0.885	3.2068e-10	0.3		1	1	0	2008	2008
Acute kidney injury	C2609414	IFNA2	3440	P01563	interferon alpha 2		355	0.442	0.885		0.3		1	1	0	2003	2003
Acute kidney injury	C2609414	HPX	3263	P02790	hemopexin	Enzyme	76	0.599	0.731	1.3005e-11	0.3		1	1	0	2017	2017
Acute kidney injury	C2609414	HSPA1A	3303	P0DMV8;P0DMV9	heat shock protein family A (Hsp70) member 1A		229	0.486	0.769	0.030228	0.3		1	2	0	2003	2009
Acute kidney injury	C2609414	AVP	551	P01185	arginine vasopressin	Signaling	454	0.437	0.846	0.074413	0.3		1	1	0	1990	1990
Acute kidney injury	C2609414	KLK1	3816	P06870	kallikrein 1	Enzyme	132	0.533	0.769	0.00015311	0.3		1	1	0	2008	2008
Acute kidney injury	C2609414	KNG1	3827	P01042	kininogen 1	Enzyme modulator	279	0.481	0.885	3.2071e-10	0.3		1	2	0	1979	1986
Acute kidney injury	C2609414	MIR25	407014		microRNA 25		148	0.517	0.769		0.3		1	1	0	2019	2019
Acute kidney injury	C2609414	PLG	5340	P00747	plasminogen	Enzyme	586	0.389	0.923	0.010345	0.3		1	1	0	2017	2017
Acute kidney injury	C2609414	MIR30A	407029		microRNA 30a		218	0.478	0.808		0.3		1	1	0	2019	2019
Acute kidney injury	C2609414	MIR30D	407033		microRNA 30d		97	0.563	0.654		0.3		1	1	0	2019	2019
Acute kidney injury	C2609414	MIR99A	407055		microRNA 99a		122	0.536	0.808		0.3		1	1	0	2019	2019
Acute kidney injury	C2609414	SERPINA1	5265	P01009	serpin family A member 1	Enzyme modulator	482	0.41	0.923	6.8497e-08	0.3		1	1	0	2017	2017
Acute kidney injury	C2609414	TNFRSF12A	51330	Q9NP84	TNF receptor superfamily member 12A		173	0.509	0.692	0.017995	0.3		1	1	0	2013	2013
Acute kidney injury	C2609414	IL20	50604	Q9NYY1	interleukin 20		111	0.556	0.769	1.3447e-06	0.3		1	1	0	2008	2008
Acute kidney injury	C2609414	NFKB1	4790	P19838	nuclear factor kappa B subunit 1	Transcription factor	551	0.396	0.923	1	0.3		1	1	0	2018	2018
Acute kidney injury	C2609414	NOS2	4843	P35228	nitric oxide synthase 2		783	0.364	0.923	4.0277e-15	0.3		1	1	0	1998	1998
Acute kidney injury	C2609414	MIR23A	407010		microRNA 23a		174	0.499	0.808		0.3		1	1	0	2019	2019
Acute kidney injury	C2609414	MIR215	406997		microRNA 215		96	0.559	0.654		0.3		1	1	0	2019	2019
Acute kidney injury	C2609414	POMC	5443	P01189	proopiomelanocortin		873	0.356	0.846	0.00011658	0.3		1	1	0	2007	2007
Acute kidney injury	C2609414	UOX	391051		urate oxidase (pseudogene)		22	0.711	0.385		0.3		1	1	0	2005	2005
Acute kidney injury	C2609414	LRP2	4036	P98164	LDL receptor related protein 2		254	0.491	0.846	0.99999	0.3		1	1	0	2018	2018
Acute kidney injury	C2609414	MIRLET7I	406891		microRNA let-7i		86	0.575	0.615		0.3		1	1	0	2019	2019
Acute kidney injury	C2609414	MIR10A	406902		microRNA 10a		158	0.513	0.846		0.3		1	1	0	2019	2019
Acute kidney injury	C2609414	MIR122	406906		microRNA 122		250	0.468	0.808		0.3		1	1	0	2019	2019
Acute kidney injury	C2609414	MIR140	406932		microRNA 140		144	0.522	0.769		0.3		1	1	0	2019	2019
Acute kidney injury	C2609414	MIR143	406935		microRNA 143		267	0.462	0.885		0.3		1	1	0	2019	2019
Acute kidney injury	C2609414	MIR148A	406940		microRNA 148a		172	0.506	0.846		0.3		1	1	0	2019	2019
Acute kidney injury	C2609414	MIR192	406967		microRNA 192		173	0.503	0.846		0.3		1	1	0	2019	2019
Acute kidney injury	C2609414	ORM1	5004	P02763	orosomucoid 1		67	0.608	0.731	1.1456e-05	0.3		1	1	0	2017	2017
Acute kidney injury	C2609414	GSTM2	2946	P28161	glutathione S-transferase mu 2		195	0.488	0.808	3.3913e-07	0.3		1	1	0	2011	2011
Acute kidney injury	C2609414	RAPGEF3	10411	O95398	Rap guanine nucleotide exchange factor 3	Enzyme modulator	99	0.593	0.692	7.0737e-23	0.3		1	1	0	2012	2012
Acute kidney injury	C2609414	CD44	960	P16070	CD44 molecule (Indian blood group)		711	0.363	0.962	2.4476e-07	0.3		1	1	0	2013	2013
Acute kidney injury	C2609414	TNF	7124	P01375	tumor necrosis factor	Signaling	2724	0.231	0.962	0.8033	0.3		1	3	0	2006	2011
Acute kidney injury	C2609414	TLR2	7097	O60603	toll like receptor 2		749	0.361	0.923	1.0152e-06	0.3		1	1	0	2018	2018
Acute kidney injury	C2609414	AFM	173	P43652	afamin	Transporter	86	0.59	0.731	4.2654e-19	0.3		1	1	0	2017	2017
Acute kidney injury	C2609414	THBD	7056	P07204	thrombomodulin		303	0.457	0.769	0.053769	0.3		1	1	0	2009	2009
Acute kidney injury	C2609414	EDN1	1906	P05305	endothelin 1	Signaling	679	0.38	0.846	0.45504	0.3		1	1	0	1998	1998
Acute kidney injury	C2609414	TGFB1	7040	P01137	transforming growth factor beta 1	Signaling	1558	0.287	0.962	0.03685	0.3		1	1	0	1999	1999
Acute kidney injury	C2609414	AHSG	197	P02765	alpha 2-HS glycoprotein	Enzyme modulator	204	0.506	0.846	3.209e-10	0.3		1	1	0	2017	2017
Acute kidney injury	C2609414	A2M	2	P01023	alpha-2-macroglobulin	Enzyme modulator	147	0.529	0.769	4.5229e-11	0.3		1	1	0	2013	2013
Acute kidney injury	C2609414	EPHX2	2053	P34913	epoxide hydrolase 2	Enzyme	97	0.568	0.654	1.7936e-21	0.3		1	1	0	2015	2015
Acute kidney injury	C2609414	CYP2D6	1565	P10635	cytochrome P450 family 2 subfamily D member 6		432	0.437	0.885	1.0793e-25	0.3		1	1	0	2009	2009
Acute kidney injury	C2609414	CYP2C9	1559	P11712	cytochrome P450 family 2 subfamily C member 9		201	0.506	0.885	1.2709e-10	0.3		1	1	0	2009	2009
Acute kidney injury	C2609414	CYP2C19	1557	P33261	cytochrome P450 family 2 subfamily C member 19		274	0.467	0.846	6.4882e-20	0.3		1	1	0	2009	2009
Acute kidney injury	C2609414	GPNMB	10457	Q14956	glycoprotein nmb	Signaling	103	0.566	0.692	2.8803e-27	0.3		1	1	0	2013	2013
Acute kidney injury	C2609414	AMN	81693	Q9BXJ7	amnion associated transmembrane protein		43	0.678	0.577	0.00026529	0.3		1	1	0	2011	2011
Acute kidney injury	C2609414	OCLN	100506658	Q16625	occludin		195	0.507	0.846	8.5583e-07	0.3		1	1	0	2009	2009
Acute kidney injury	C2609414	VEGFA	7422	P15692	vascular endothelial growth factor A	Signaling	1899	0.266	0.923	2.4085e-05	0.3		1	2	0	2011	2012
Acute kidney injury	C2609414	FSTL1	11167	Q12841	follistatin like 1	Enzyme modulator	128	0.541	0.808	0.89403	0.3		1	1	0	2010	2010
Acute kidney injury	C2609414	TTR	7276	P02766	transthyretin	Transporter	461	0.423	0.885	0.51566	0.3		1	1	0	2017	2017
Acute kidney injury	C2609414	CCR5	1234	P51681	C-C motif chemokine receptor 5 (gene/pseudogene)	G-protein coupled receptor	508	0.398	0.885	4.3094e-10	0.3		1	1	0	2016	2016
Acute kidney injury	C2609414	CP	1356	P00450	ceruloplasmin	Enzyme	283	0.466	0.846	4.2013e-10	0.3		1	1	0	2017	2017
Acute kidney injury	C2609414	CST3	1471	P01034	cystatin C		370	0.436	0.808	0.0039011	0.3		1	2	0	2011	2017
Acute kidney injury	C2609414	TP53	7157	P04637	tumor protein p53	Transcription factor	2494	0.236	0.962	0.53235	0.3		1	1	0	2010	2010
Acute kidney injury	C2609414	EPO	2056	P01588	erythropoietin		646	0.381	0.885	0.01125	0.3		1	2	0	2011	2014
Acute kidney injury	C2609414	TFF3	7033	Q07654	trefoil factor 3	Signaling	163	0.518	0.885	0.01591	0.3		1	1	0	2013	2013
Acute kidney injury	C2609414	ALB	213	P02768	albumin	Transporter	1198	0.317	0.962	0.64329	0.3		1	4	0	1991	2017
Acute kidney injury	C2609414	GC	2638	P02774	GC vitamin D binding protein	Transporter	219	0.489	0.885	2.7301e-11	0.3		1	1	0	2017	2017
Acute kidney injury	C2609414	GAS6	2621	Q14393	growth arrest specific 6	Extracellular structure	190	0.5	0.769	0.034477	0.3		1	1	0	2009	2009
Acute kidney injury	C2609414	AMBP	259	P02760	alpha-1-microglobulin/bikunin precursor		150	0.537	0.731	2.7886e-13	0.3		1	2	0	1996	2017
Acute kidney injury	C2609414	G6PD	2539	P11413	glucose-6-phosphate dehydrogenase	Enzyme	410	0.424	0.846	0.97158	0.3		1	3	0	1973	1978
Acute kidney injury	C2609414	SLC22A24	283238	Q8N4F4	solute carrier family 22 member 24	Transporter	6	0.89	0.077	1.7875e-14	0.3		1	2	0	2013	2015
Acute kidney injury	C2609414	BDKRB2	624	P30411	bradykinin receptor B2	G-protein coupled receptor	105	0.585	0.808	0.11863	0.3		1	1	0	2014	2014
Acute kidney injury	C2609414	SLC11A1	6556	P49279	solute carrier family 11 member 1	Transporter	141	0.525	0.846	1.5485e-19	0.3		1	1	0	2011	2011
Acute kidney injury	C2609414	TF	7018	P02787	transferrin	Enzyme	168	0.527	0.846	4.1001e-08	0.3		1	1	0	2017	2017
Acute kidney injury	C2609414	SOD1	6647	P00441	superoxide dismutase 1	Enzyme	689	0.379	0.962	0.1773	0.3		1	1	0	2017	2017
Acute kidney injury	C2609414	GSK3B	2932	P49841	glycogen synthase kinase 3 beta	Kinase	393	0.43	0.846	0.95571	0.3		1	1	0	2012	2012
Acute kidney injury	C2609414	SPP1	6696	P10451	secreted phosphoprotein 1		824	0.353	0.885	2.146e-06	0.3		1	2	0	2001	2011
Acute kidney injury	C2609414	GSTA1	2938	P08263	glutathione S-transferase alpha 1		108	0.561	0.731	1.7305e-06	0.3		1	1	0	2017	2017
Acute kidney injury	C2609414	CAPN1	823	P07384	calpain 1	Enzyme	165	0.539	0.808	5.8554e-10	0.2		1	1	0	2013	2013
Acute kidney injury	C2609414	PTGER4	5734	P35408	prostaglandin E receptor 4	G-protein coupled receptor	120	0.558	0.731	0.9755	0.2		1	1	0	2006	2006
Acute kidney injury	C2609414	SCGB1A1	7356	P11684	secretoglobin family 1A member 1	Signaling	133	0.546	0.808	0.00079919	0.2		1	1	0	2008	2008
Acute kidney injury	C2609414	PTGS2	5743	P35354	prostaglandin-endoperoxide synthase 2	Enzyme	1234	0.314	0.962	0.99597	0.2		1	1	0	2011	2011
Acute kidney injury	C2609414	HDAC3	8841	O15379	histone deacetylase 3	Epigenetic regulator	179	0.511	0.731	0.56737	0.2		1	1	0	2011	2011
Acute kidney injury	C2609414	CASP1	834	P29466	caspase 1	Enzyme	444	0.413	0.885	3.5183e-05	0.2		1	1	0	2006	2006
Acute kidney injury	C2609414	FIS1	51024	Q9Y3D6	fission, mitochondrial 1		40	0.663	0.769	1.302e-05	0.2		1	1	0	2015	2015
Acute kidney injury	C2609414	RB1	5925	P06400	RB transcriptional corepressor 1	Nucleic acid binding	339	0.444	0.885	1	0.2		1	1	0	2009	2009
Acute kidney injury	C2609414	PKD2	5311	Q13563	polycystin 2, transient receptor potential cation channel	Ion channel	122	0.552	0.731	0.00017271	0.2		1	1	0	2002	2002
Acute kidney injury	C2609414	BCL2	596	P10415	BCL2 apoptosis regulator	Signaling	1456	0.291	0.885	0.55903	0.2		1	1	0	2010	2010
Acute kidney injury	C2609414	EGLN1	54583	Q9GZT9	egl-9 family hypoxia inducible factor 1		130	0.54	0.731	0.97403	0.2		1	1	0	2009	2009
Acute kidney injury	C2609414	TGFA	7039	P01135	transforming growth factor alpha	Signaling	376	0.432	0.885	0.71981	0.2		1	1	0	2001	2001
Acute kidney injury	C2609414	CYP2E1	1571	P05181	cytochrome P450 family 2 subfamily E member 1		306	0.459	0.885	8.0688e-09	0.2		1	2	0	2014	2014
Acute kidney injury	C2609414	WNT4	54361	P56705	Wnt family member 4	Signaling	135	0.552	0.731	0.12766	0.2		1	1	0	2003	2003
Acute kidney injury	C2609414	SLC22A2	6582	O15244	solute carrier family 22 member 2	Transporter	98	0.572	0.769	2.0202e-12	0.2		1	2	0	2008	2012
Acute kidney injury	C2609414	SLC22A1	6580	O15245	solute carrier family 22 member 1	Transporter	119	0.556	0.731	1.4614e-22	0.2		1	1	0	2012	2012
Acute kidney injury	C2609414	AVPR1A	552	P37288	arginine vasopressin receptor 1A	G-protein coupled receptor	51	0.663	0.5	6.8987e-07	0.2		1	1	0	2006	2006
Acute kidney injury	C2609414	MFN1	55669	Q8IWA4	mitofusin 1	Enzyme	45	0.644	0.577	2.5118e-10	0.2		1	1	0	2015	2015
Acute kidney injury	C2609414	BAD	572	Q92934	BCL2 associated agonist of cell death		125	0.553	0.769	0.0046237	0.2		1	1	0	2010	2010
Acute kidney injury	C2609414	BCL2L1	598	Q07817	BCL2 like 1	Signaling	212	0.493	0.885	0.93667	0.2		1	1	0	2010	2010
Acute kidney injury	C2609414	PTAFR	5724	P25105	platelet activating factor receptor	G-protein coupled receptor	96	0.575	0.731	0.24232	0.2		1	1	0	1989	1989
Acute kidney injury	C2609414	XDH	7498	P47989	xanthine dehydrogenase	Enzyme	165	0.529	0.846	2.589e-22	0.2		1	2	0	2010	2012
Acute kidney injury	C2609414	CDKN1B	1027	P46527	cyclin dependent kinase inhibitor 1B		454	0.409	0.769	0.62376	0.2		1	1	0	2006	2006
Acute kidney injury	C2609414	ALAD	210	P13716	aminolevulinate dehydratase	Enzyme	135	0.556	0.615	5.6185e-05	0.2		1	1	0	2009	2009
Acute kidney injury	C2609414	FN1	2335	P02751	fibronectin 1	Signaling	724	0.365	0.962	0.0014045	0.2		1	2	0	2001	2003
Acute kidney injury	C2609414	HDAC5	10014	Q9UQL6	histone deacetylase 5	Epigenetic regulator	114	0.552	0.769	1	0.2		1	1	0	2011	2011
Acute kidney injury	C2609414	ALOX5	240	P09917	arachidonate 5-lipoxygenase	Enzyme	342	0.447	0.885	1.2059e-06	0.2		1	1	0	2009	2009
Acute kidney injury	C2609414	FGA	2243	P02671	fibrinogen alpha chain		118	0.573	0.769	1.2236e-13	0.2		1	1	0	2005	2005
Acute kidney injury	C2609414	MTOR	2475	P42345	mechanistic target of rapamycin kinase	Kinase	960	0.343	0.885	1	0.2		1	1	0	2012	2012
Acute kidney injury	C2609414	GATM	2628	P50440	glycine amidinotransferase		46	0.666	0.615	0.051418	0.2		1	1	0	1989	1989
Acute kidney injury	C2609414	GOT2	2806	P00505	glutamic-oxaloacetic transaminase 2		148	0.529	0.731	0.014233	0.2		1	1	0	2013	2013
Acute kidney injury	C2609414	UTS2R	2837	Q9UKP6	urotensin 2 receptor	G-protein coupled receptor	98	0.566	0.692	2.3172e-05	0.2		1	1	0	2004	2004
Acute kidney injury	C2609414	EPAS1	2034	Q99814	endothelial PAS domain protein 1	Transcription factor	293	0.454	0.731	0.5961	0.2		1	1	0	2006	2006
Acute kidney injury	C2609414	EGF	1950	P01133	epidermal growth factor		774	0.357	0.923	8.5294e-17	0.2		1	1	0	2001	2001
Acute kidney injury	C2609414	PROCR	10544	Q9UNN8	protein C receptor	Enzyme modulator	110	0.56	0.692	0.0056256	0.2		1	1	0	2013	2013
Acute kidney injury	C2609414	NES	10763	P48681	nestin		302	0.45	0.808	1.6236e-06	0.2		1	1	0	2014	2014
Acute kidney injury	C2609414	EGLN3	112399	Q9H6Z9	egl-9 family hypoxia inducible factor 3		97	0.575	0.654	0.0094753	0.2		1	1	0	2009	2009
Acute kidney injury	C2609414	CRP	1401	P02741	C-reactive protein		1483	0.299	0.962	0.0036969	0.2		1	1	0	2012	2012
Acute kidney injury	C2609414	ADRB2	154	P07550	adrenoceptor beta 2	G-protein coupled receptor	387	0.442	0.923	0.52545	0.2		1	2	0	2004	2009
Acute kidney injury	C2609414	CYP27B1	1594	O15528	cytochrome P450 family 27 subfamily B member 1	Enzyme	229	0.502	0.769	1.9194e-07	0.2		1	1	0	1983	1983
Acute kidney injury	C2609414	ACE	1636	P12821	angiotensin I converting enzyme	Enzyme	1082	0.328	0.923	1.0344e-37	0.2		1	1	0	2014	2014
Acute kidney injury	C2609414	DDIT3	1649	P35638	DNA damage inducible transcript 3		264	0.467	0.846	0.59066	0.2		1	1	0	2004	2004
Acute kidney injury	C2609414	ECE1	1889	P42892	endothelin converting enzyme 1	Enzyme	157	0.541	0.769	0.95987	0.2		1	2	0	1999	2000
Acute kidney injury	C2609414	GSR	2936	P00390	glutathione-disulfide reductase	Enzyme	206	0.494	0.846	1.2922e-06	0.2		1	1	0	1991	1991
Acute kidney injury	C2609414	ANXA1	301	P04083	annexin A1		336	0.442	0.885	1.2009e-07	0.2		1	1	0	2012	2012
Acute kidney injury	C2609414	ARG1	383	P05089	arginase 1	Enzyme	273	0.476	0.846	0.00035944	0.2		1	1	0	2002	2002
Acute kidney injury	C2609414	NDUFB8	4714	O95169	NADH:ubiquinone oxidoreductase subunit B8	Enzyme	84	0.638	0.654	0.0074738	0.2		1	1	0	2012	2012
Acute kidney injury	C2609414	HIF1A	3091	Q16665	hypoxia inducible factor 1 subunit alpha	Transcription factor	1044	0.327	0.923	0.9777	0.2		1	3	0	2005	2008
Acute kidney injury	C2609414	MET	4233	P08581	MET proto-oncogene, receptor tyrosine kinase	Kinase	594	0.38	0.846	0.96998	0.2		1	1	0	2007	2007
Acute kidney injury	C2609414	IL1B	3553	P01584	interleukin 1 beta		1801	0.276	0.962	0.13005	0.2		1	2	0	2012	2012
Acute kidney injury	C2609414	AR	367	P10275	androgen receptor	Nuclear receptor	854	0.351	0.846	0.98837	0.2		1	1	0	2014	2014
Acute kidney injury	C2609414	ARG2	384	P78540	arginase 2	Enzyme	103	0.569	0.731	0.00018207	0.2		1	1	0	2002	2002
Acute kidney injury	C2609414	LGALS3	3958	P17931	galectin 3	Signaling	557	0.392	0.846	2.3207e-05	0.2		1	1	0	2000	2000
Acute kidney injury	C2609414	MIR26A1	407015		microRNA 26a-1		38	0.653	0.577		0.2		1	1	0	2019	2019
Acute kidney injury	C2609414	IGF1R	3480	P08069	insulin like growth factor 1 receptor	Kinase	556	0.399	0.885	0.96799	0.2		1	1	0	1998	1998
Acute kidney injury	C2609414	MB	4151	P02144	myoglobin		125	0.556	0.731	0.030636	0.2		1	1	0	1998	1998
Acute kidney injury	C2609414	NPPB	4879	P16860	natriuretic peptide B		193	0.513	0.808	9.8786e-06	0.2		1	1	0	2012	2012
Acute kidney injury	C2609414	NOS1	4842	P29475	nitric oxide synthase 1		521	0.408	0.885	1	0.2		1	1	0	2003	2003
Acute kidney injury	C2609414	HES1	3280	Q14469	hes family bHLH transcription factor 1	Transcription factor	243	0.468	0.885	0.7072	0.2		1	2	0	2013	2013
Acute kidney injury	C2609414	HSPA8	3312	P11142	heat shock protein family A (Hsp70) member 8		124	0.553	0.808	0.99863	0.2		1	1	0	2004	2004
Acute kidney injury	C2609414	ICAM1	3383	P05362	intercellular adhesion molecule 1		737	0.364	0.962	0.035295	0.2		1	1	0	2012	2012
Acute kidney injury	C2609414	CFHR3	10878	Q02985	complement factor H related 3		55	0.663	0.462	1.72e-11	0.1			0	0
Acute kidney injury	C2609414	CORIN	10699	Q9Y5Q5	corin, serine peptidase		55	0.695	0.538	6.5072e-35	0.1			0	0
Acute kidney injury	C2609414	SLC26A1	10861	Q9H2B4	solute carrier family 26 member 1	Ion channel	33	0.686	0.577	1.0564e-11	0.1			0	0
Acute kidney injury	C2609414	CACNA1S	779	Q13698	calcium voltage-gated channel subunit alpha1 S	Ion channel	118	0.595	0.692	6.2588e-12	0.1			0	0
Acute kidney injury	C2609414	CD46	4179	P15529	CD46 molecule		258	0.477	0.808	4.7013e-07	0.1			0	0
Acute kidney injury	C2609414	DGKE	8526	P52429	diacylglycerol kinase epsilon	Enzyme	41	0.674	0.538	5.4906e-06	0.1			0	1
Acute kidney injury	C2609414	HELLPAR	101101692		HELLP associated long non-coding RNA		40	0.76	0.269		0.1			0	0
Acute kidney injury	C2609414	TRIM25	7706	Q14258	tripartite motif containing 25		58	0.633	0.462	0.0041202	0.1			0	1
Acute kidney injury	C2609414	CFH	3075	P08603	complement factor H		393	0.441	0.885	0.86061	0.1			0	0
Acute kidney injury	C2609414	CFHR1	3078	Q03591	complement factor H related 1		90	0.588	0.615	2.6297e-08	0.1			0	0
Acute kidney injury	C2609414	CCND1	595	P24385	cyclin D1	Enzyme modulator	859	0.344	0.923	0.89057	0.1			0	0
Acute kidney injury	C2609414	HNF4A	3172	P41235	hepatocyte nuclear factor 4 alpha	Nuclear receptor	340	0.461	0.808	0.15285	0.1			0	0
Acute kidney injury	C2609414	HPRT1	3251	P00492	hypoxanthine phosphoribosyltransferase 1	Enzyme	210	0.5	0.808	0.93728	0.1			0	0
Acute kidney injury	C2609414	RYR1	6261	P21817	ryanodine receptor 1	Ion channel	320	0.489	0.808	1.5944e-29	0.1			0	0
Acute kidney injury	C2609414	CFB	629	P00751	complement factor B		139	0.532	0.769	4.6696e-16	0.1			0	0
Acute kidney injury	C2609414	CFI	3426	P05156	complement factor I		133	0.569	0.731	3.5432e-08	0.1			0	0
Acute kidney injury	C2609414	FLT1	2321	P17948	fms related receptor tyrosine kinase 1	Kinase	424	0.419	0.846	0.99983	0.1			0	0
Acute kidney injury	C2609414	LPIN1	23175	Q14693	lipin 1		86	0.601	0.692	6.4522e-13	0.1			0	0
Acute kidney injury	C2609414	SAA1	6288	P0DJI8	serum amyloid A1	Transporter	188	0.513	0.808	0.01493	0.1			0	0
Acute kidney injury	C2609414	TCN2	6948	P20062	transcobalamin 2		104	0.578	0.615	1.0478e-06	0.1			0	0
Acute kidney injury	C2609414	STOX1	219736	Q6ZVD7	storkhead box 1		39	0.729	0.462	1.4404e-16	0.1			0	0
Acute kidney injury	C2609414	HNF1B	6928	P35680	HNF1 homeobox B	Nucleic acid binding	279	0.473	0.808	0.99976	0.1			0	0
